# Supplementary material for: 90Y-NM600 targeted radionuclide therapy induces immunologic memory in syngeneic models of T-cell Non-Hodgkin’s Lymphoma
Source: PubMed Central journal article supplement (PMC6391402; doi:10.1038/s42003-019-0327-4), 2019-02-26
Supplement: 42003_2019_327_MOESM1_ESM.pdf [file 42003_2019_327_MOESM1_ESM.pdf]

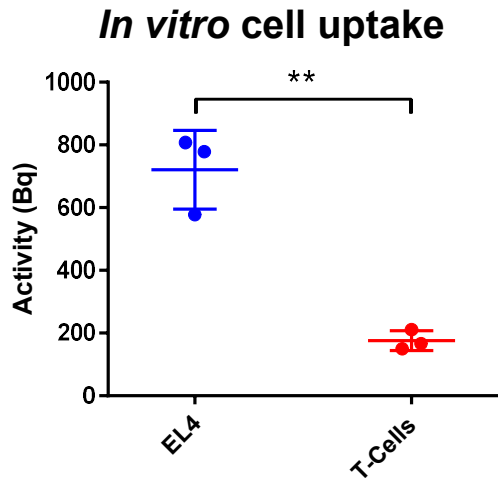

**Supplementary Figure 1** *In vitro* uptake of <sup>86</sup>Y-NM600 in EL4 cancer cells vs. normal T-cell isolated from the spleens of C57BL/6 mice.

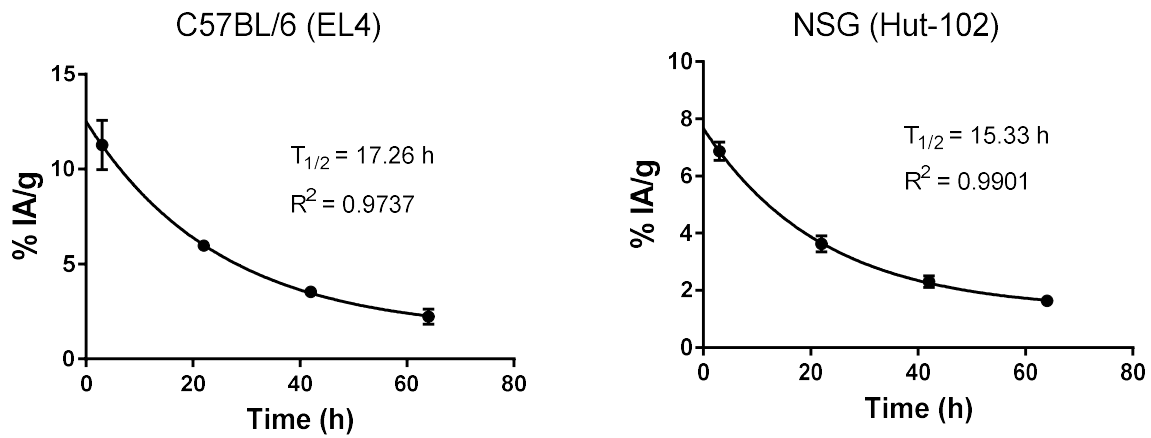

**Supplementary Figure 2** Blood time-activity curves of  $^{86}\text{Y}$ -NM600 in B6 mice bearing syngeneic s.c. EL4 tumors of NSG mice bearing human Hut-102 T-cell NHL. Blood circulation half-life ( $T_{1/2}$ ) was calculated by fitting the quantitative PET data to a monoexponential decay. Similar circulation  $T_{1/2}$  were observed (17.26 h vs. 15.33 h) between the two groups.

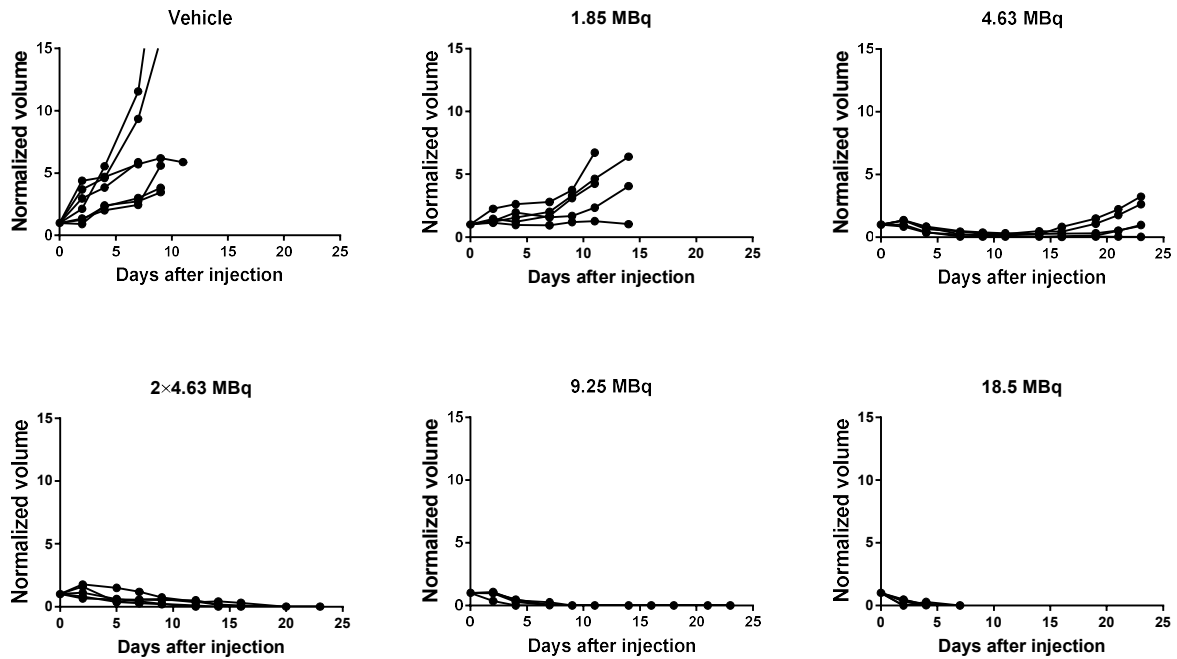

**Supplementary Figure 3** Individual tumor growth curves of mice bearing s.c. EL4 tumors injected with vehicle or 1.85, 4.63, 2x4.63, 9.25, or 18.5 MBq of  $^{90}\text{Y}$ -NM600. Data are presented as a fraction of the initial tumor volume.

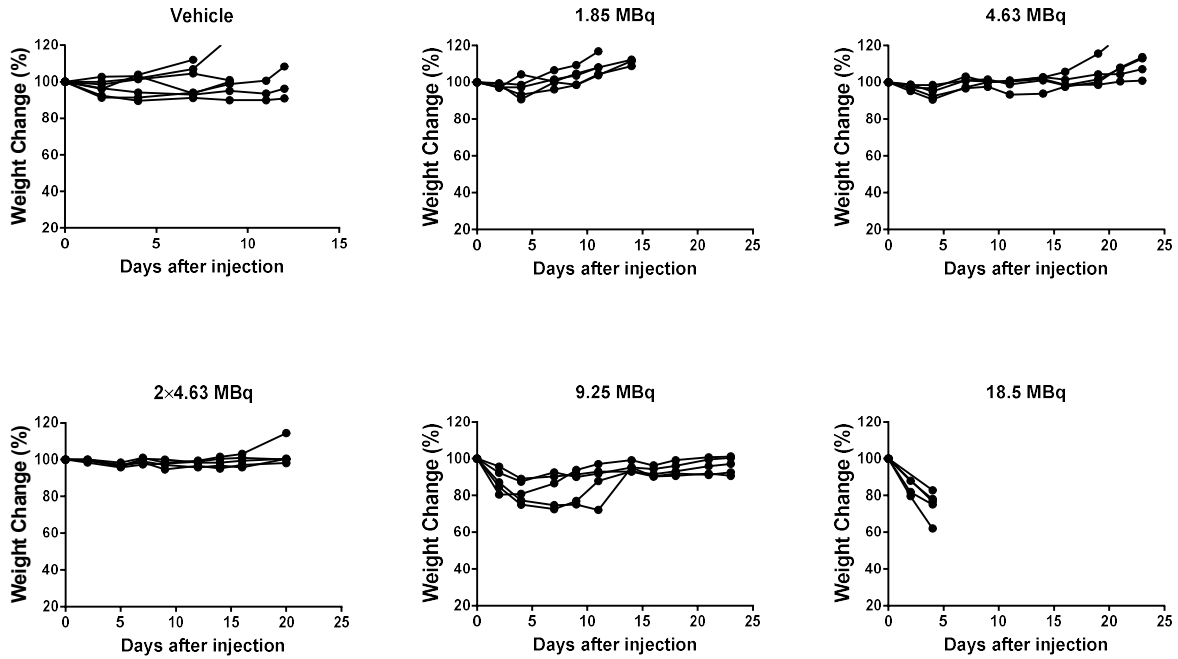

**Supplementary Figure 4** Individual weight of mice bearing s.c. EL4 tumors injected with vehicle or 1.85, 4.63, 2x4.63, 9.25, or 18.5 MBq of  $^{90}\text{Y}$ -NM600. Data are presents as percent of the initial weight.

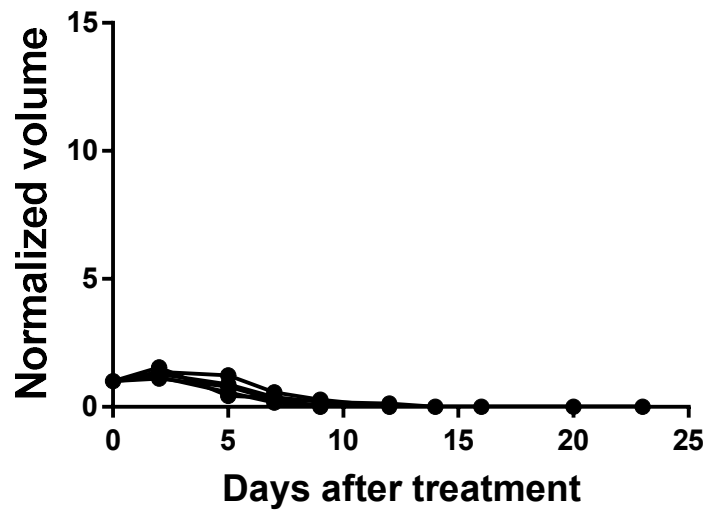

**Supplementary Figure 5** Individual tumor growth curves of the primary EL4 tumor in mice bearing both disseminated and localized tumors injected with 9.25 MBq of <sup>90</sup>Y-NM600. Data are presented as a fraction of the initial tumor volume.

**Supplementary Table 1** Results of the region-of-interest analysis of the longitudinal PET/CT data in tumor-bearing mice administered  $^{86}\text{Y}$ -NM600 (9.25 MBq) or free  $^{86}\text{Y}$  (9.25 MBq), 68 h post-injection. Data are presented as %IA/g (mean  $\pm$  SD).

| Time<br>(h p.i.)                                                | Tumor<br>(%IA/g) |      | Heart/blood<br>(%IA/g) |      | Liver<br>(%IA/g) |      | Spleen<br>(%IA/g) |      | Kidneys<br>(%IA/g) |      | Muscle<br>(%IA/g) |      | Bone/Marrow<br>(%IA/g) |      |
|-----------------------------------------------------------------|------------------|------|------------------------|------|------------------|------|-------------------|------|--------------------|------|-------------------|------|------------------------|------|
|                                                                 | Mean             | SD   | Mean                   | SD   | Mean             | SD   | Mean              | SD   | Mean               | SD   | Mean              | SD   | Mean                   | SD   |
| <b><math>^{86}\text{Y}</math>-NM600 in EL4 bearing mice</b>     |                  |      |                        |      |                  |      |                   |      |                    |      |                   |      |                        |      |
| <b>3</b>                                                        | 5.74             | 0.67 | 16.45                  | 1.91 | 13.14            | 1.25 | 5.55              | 1.68 | 7.79               | 0.45 | 2.53              | 0.08 | 2.92                   | 0.25 |
| <b>22</b>                                                       | 9.35             | 0.15 | 8.71                   | 0.08 | 13.73            | 0.64 | 6.13              | 0.81 | 4.48               | 3.88 | 1.90              | 0.00 | 2.58                   | 0.17 |
| <b>42</b>                                                       | 9.64             | 1.20 | 5.16                   | 0.34 | 10.90            | 0.86 | 5.45              | 0.08 | 5.74               | 0.45 | 1.43              | 0.03 | 1.85                   | 0.22 |
| <b>64</b>                                                       | 9.05             | 1.02 | 3.26                   | 0.59 | 8.57             | 0.95 | 4.87              | 1.88 | 4.62               | 1.28 | 1.06              | 0.12 | 1.48                   | 0.24 |
| <b><math>^{86}\text{Y}</math>-NM600 in Hut-102 bearing mice</b> |                  |      |                        |      |                  |      |                   |      |                    |      |                   |      |                        |      |
| <b>3</b>                                                        | 4.20             | 0.36 | 6.87                   | 0.32 | 6.60             | 0.62 | 4.27              | 0.61 | 4.00               | 0.17 | 1.83              | 0.32 | 2.30                   | 0.20 |
| <b>22</b>                                                       | 8.80             | 1.64 | 3.63                   | 0.29 | 8.77             | 0.68 | 3.97              | 2.10 | 2.97               | 0.15 | 0.74              | 0.07 | 1.60                   | 0.14 |
| <b>42</b>                                                       | 8.70             | 0.92 | 2.30                   | 0.20 | 7.00             | 0.61 | 3.60              | 0.52 | 2.43               | 0.21 | 0.95              | 0.08 | 1.60                   | 0.00 |
| <b>64</b>                                                       | 8.13             | 1.19 | 1.63                   | 0.12 | 5.60             | 0.80 | 3.00              | 1.23 | 2.07               | 0.15 | 0.80              | 0.04 | 1.10                   | 0.10 |
| <b>Free <math>^{86}\text{Y}</math> in EL4 bearing mice</b>      |                  |      |                        |      |                  |      |                   |      |                    |      |                   |      |                        |      |
| <b>3</b>                                                        | 6.67             | 0.80 | 2.07                   | 0.21 | 4.67             | 0.49 | 2.40              | 0.26 | 5.37               | 2.30 | 1.16              | 0.30 | 7.70                   | 1.30 |
| <b>22</b>                                                       | 5.90             | 1.01 | 1.47                   | 0.21 | 4.20             | 0.30 | 1.80              | 0.10 | 3.70               | 1.10 | 0.79              | 0.06 | 8.03                   | 0.55 |
| <b>42</b>                                                       | 6.05             | 0.78 | 1.77                   | 0.61 | 3.27             | 1.58 | 2.50              | 0.30 | 3.97               | 3.33 | 1.14              | 0.41 | 5.30                   | 3.24 |
| <b>64</b>                                                       | 5.70             | 0.90 | 1.77                   | 0.47 | 4.47             | 0.84 | 1.87              | 0.60 | 4.43               | 2.87 | 0.92              | 0.22 | 7.57                   | 1.56 |

**Supplementary Table 2** Results of *ex vivo* biodistribution in tumor-bearing mice administered  $^{86}\text{Y}$ -NM600 (9.25 MBq) of free  $^{86}\text{Y}$  (9.25 MBq), 68 h post-injection. Data is presented as %IA/g (mean  $\pm$  SD).

| Tissue      | EL4 bearing mice |      | Hut-102 bearing mice |      | Free $^{86}\text{Y}$ in EL4 bearing mice |      |
|-------------|------------------|------|----------------------|------|------------------------------------------|------|
|             | Mean*            | SD   | Mean*                | SD   | Mean*                                    | SD   |
| Tumor       | 10.28            | 0.74 | 10.54                | 1.08 | 4.98                                     | 0.42 |
| Blood       | 2.89             | 0.33 | 1.30                 | 0.10 | 0.02                                     | 0.02 |
| Skin        | 3.88             | 0.58 | 1.43                 | 0.08 | 0.35                                     | 0.09 |
| Muscle      | 0.45             | 0.10 | 0.29                 | 0.02 | 0.10                                     | 0.06 |
| Bone/Marrow | 1.64             | 0.33 | 0.28                 | 0.05 | 13.90                                    | 5.72 |
| Heart       | 2.09             | 0.26 | 1.07                 | 0.06 | 0.24                                     | 0.03 |
| Lung        | 3.09             | 0.20 | 1.40                 | 0.12 | 0.27                                     | 0.08 |
| Liver       | 9.98             | 0.47 | 7.26                 | 0.76 | 5.14                                     | 1.48 |
| Kidney      | 4.96             | 0.78 | 2.45                 | 0.26 | 4.72                                     | 1.80 |
| Spleen      | 5.26             | 0.24 | 3.90                 | 0.71 | 1.00                                     | 0.24 |
| Pancreas    | 1.20             | 0.37 | 0.58                 | 0.11 | 0.14                                     | 0.00 |
| Stomach     | 1.26             | 0.18 | 0.63                 | 0.09 | 0.41                                     | 0.16 |
| Intestine   | 3.68             | 0.66 | 0.60                 | 0.16 | 0.27                                     | 0.09 |
| Brain       | 0.17             | 0.04 | 0.06                 | 0.05 | 0.02                                     | 0.00 |

\*data is presented as percent injected activity per gram of tissue (%IA/g)

**Supplementary Table 3** Summary of results from the dosimetry estimation for  $^{90}\text{Y}$ -NM600 using longitudinal  $^{86}\text{Y}$ -NM600 PET/CT data and The Standard Mouse Model.

| Target Organ    | Cumulative Activity<br>[(MBq-sec)/MBq] | $\sum_s \phi_B(r_t \leftarrow r_s)(\bar{A}_s)$ | Absorbed Dose<br>(Gy/MBq) | Dose<br>(9.25 MBq) |
|-----------------|----------------------------------------|------------------------------------------------|---------------------------|--------------------|
| <b>Liver</b>    | 28644.57                               | 21282.91                                       | 3.04                      | 28.1               |
| <b>Spleen</b>   | 1332.53                                | 1044.35                                        | 1.74                      | 16.1               |
| <b>Kidney</b>   | 3980.59                                | 3058.51                                        | 1.73                      | 16.0               |
| <b>Lungs</b>    | 1361.76                                | 3344.07                                        | 3.34                      | 30.9               |
| <b>Heart</b>    | 1943.09                                | 1451.62                                        | 1.89                      | 17.5               |
| <b>Stomach</b>  | 1588.72                                | 2322.27                                        | 1.99                      | 18.4               |
| <b>S bowel</b>  | 7970.82                                | 10947.58                                       | 1.87                      | 17.3               |
| <b>L bowel</b>  | 3014.02                                | 2799.23                                        | 1.26                      | 11.7               |
| <b>Thyroid</b>  | 953.23                                 | 963.16                                         | 1.37                      | 12.7               |
| <b>Tumor</b>    | 26004.45                               | 17978.74                                       | 2.69                      | 24.9               |
| <b>Pancreas</b> | 953.23                                 | 662.53                                         | 0.95                      | 8.7                |
| <b>Bone</b>     | 998.62                                 | 1041.73                                        | 1.42                      | 13.1               |
| <b>Marrow</b>   | 30.80                                  | 47.16                                          | 0.79                      | 7.3                |
| <b>Carcass</b>  | 191699.11                              | 194828.76                                      | 1.38                      | 12.8               |



**Supplementary Table 4** Summary of the CBC results for white blood counts (WBC) in  $10^3$  cells/ $\mu$ L (mean  $\pm$  SD). N indicates the sample size for each group.

| Timepoint<br>(days p.i.) | Control                  |      |   | IA<br>(1.85 MBq) |      |   | IA<br>(4.63 MBq) |      |   | IA<br>(9.25 MBq) |      |   |
|--------------------------|--------------------------|------|---|------------------|------|---|------------------|------|---|------------------|------|---|
|                          | Mean                     | SD   | N | Mean             | SD   | N | Mean             | SD   | N | Mean             | SD   | N |
| <b>0</b>                 | 11.11                    | 1.68 | 5 |                  |      |   |                  |      |   |                  |      |   |
|                          | Acute toxicity study     |      |   |                  |      |   |                  |      |   |                  |      |   |
| <b>0</b>                 |                          |      |   | 9.05             | 0.87 | 5 | 12.45            | 5.23 | 5 | 12.47            | 7.94 | 5 |
| <b>3</b>                 |                          |      |   | 8.50             | 4.93 | 5 | 8.75             | 3.83 | 5 | 8.86             | 2.00 | 5 |
| <b>7</b>                 |                          |      |   | 8.51             | 2.48 | 5 | 6.33             | 1.64 | 5 | 3.95             | 1.90 | 5 |
| <b>10</b>                |                          |      |   | 8.33             | 2.97 | 5 | 3.50             | 1.71 | 5 | 1.86             | 0.71 | 5 |
| <b>14</b>                |                          |      |   | 8.55             | 2.51 | 5 | 5.90             | 2.13 | 5 | 2.73             | 0.71 | 5 |
| <b>17</b>                |                          |      |   | 8.13             | 2.82 | 5 | 7.35             | 2.63 | 5 | 3.05             | 1.00 | 5 |
| <b>21</b>                |                          |      |   | 11.06            | 4.39 | 5 | 9.99             | 2.28 | 5 | 7.89             | 1.33 | 5 |
| <b>28</b>                |                          |      |   | 14.90            | 5.22 | 5 | 14.26            | 2.15 | 5 | 11.16            | 1.27 | 5 |
|                          | Long-term toxicity study |      |   |                  |      |   |                  |      |   |                  |      |   |
| <b>150</b>               |                          |      |   |                  |      |   |                  |      |   | 14.56            | 5.94 | 4 |

**Supplementary Table 5** Summary of the CBC results for lymphocyte counts (LYM) in  $10^3$  cells/ $\mu$ L (mean  $\pm$  SD). N indicates the sample size for each group.

| Timepoint<br>(days p.i.) | Control                  |      |   | IA<br>(1.85 MBq) |      |   | IA<br>(4.63 MBq) |      |   | IA<br>(9.25 MBq) |      |   |
|--------------------------|--------------------------|------|---|------------------|------|---|------------------|------|---|------------------|------|---|
|                          | Mean                     | SD   | N | Mean             | SD   | N | Mean             | SD   | N | Mean             | SD   | N |
| <b>0</b>                 | 9.54                     | 1.39 | 5 |                  |      |   |                  |      |   |                  |      |   |
|                          | Acute toxicity study     |      |   |                  |      |   |                  |      |   |                  |      |   |
| <b>0</b>                 |                          |      |   | 8.00             | 1.06 | 5 | 10.87            | 4.47 | 5 | 10.41            | 6.44 | 5 |
| <b>3</b>                 |                          |      |   | 6.23             | 3.59 | 5 | 5.16             | 2.60 | 5 | 5.04             | 1.54 | 5 |
| <b>7</b>                 |                          |      |   | 6.56             | 1.49 | 5 | 3.76             | 0.95 | 5 | 1.65             | 1.13 | 5 |
| <b>10</b>                |                          |      |   | 6.39             | 2.19 | 5 | 2.32             | 1.10 | 5 | 0.78             | 0.34 | 5 |
| <b>14</b>                |                          |      |   | 6.51             | 1.48 | 5 | 4.29             | 1.54 | 5 | 1.21             | 0.30 | 5 |
| <b>17</b>                |                          |      |   | 6.66             | 1.67 | 5 | 5.94             | 1.60 | 5 | 1.71             | 0.46 | 5 |
| <b>21</b>                |                          |      |   | 8.25             | 2.33 | 5 | 7.78             | 1.55 | 5 | 5.42             | 1.06 | 5 |
| <b>28</b>                |                          |      |   | 12.29            | 4.01 | 5 | 11.69            | 2.56 | 5 | 6.52             | 1.99 | 5 |
|                          | Long-term toxicity study |      |   |                  |      |   |                  |      |   |                  |      |   |
| <b>150</b>               |                          |      |   |                  |      |   |                  |      |   | 11.42            | 5.01 | 4 |

**Supplementary Table 6** Summary of the CBC results for monocyte counts (MON) in  $10^3$  cells/ $\mu$ L (mean  $\pm$  SD). N indicates the sample size for each group.

| Timepoint<br>(days p.i.) | Control                  |      |   | IA<br>(1.85 MBq) |      |   | IA<br>(4.63 MBq) |      |   | IA<br>(9.25 MBq) |      |   |
|--------------------------|--------------------------|------|---|------------------|------|---|------------------|------|---|------------------|------|---|
|                          | Mean                     | SD   | N | Mean             | SD   | N | Mean             | SD   | N | Mean             | SD   | N |
| <b>0</b>                 | 0.28                     | 0.18 | 5 |                  |      |   |                  |      |   |                  |      |   |
|                          | Acute toxicity study     |      |   |                  |      |   |                  |      |   |                  |      |   |
| <b>0</b>                 |                          |      |   | 0.46             | 0.31 | 5 | 0.30             | 0.36 | 5 | 0.56             | 0.69 | 5 |
| <b>3</b>                 |                          |      |   | 0.54             | 0.42 | 5 | 0.07             | 0.02 | 5 | 0.61             | 0.56 | 5 |
| <b>7</b>                 |                          |      |   | 0.44             | 0.55 | 5 | 0.10             | 0.12 | 5 | 0.44             | 0.22 | 5 |
| <b>10</b>                |                          |      |   | 0.20             | 0.14 | 5 | 0.08             | 0.07 | 5 | 0.12             | 0.11 | 5 |
| <b>14</b>                |                          |      |   | 0.36             | 0.36 | 5 | 0.11             | 0.13 | 5 | 0.08             | 0.15 | 5 |
| <b>17</b>                |                          |      |   | 0.39             | 0.69 | 5 | 0.52             | 0.63 | 5 | 0.26             | 0.18 | 5 |
| <b>21</b>                |                          |      |   | 0.10             | 0.06 | 5 | 0.60             | 0.46 | 5 | 0.30             | 0.24 | 5 |
| <b>28</b>                |                          |      |   | 0.63             | 0.33 | 5 | 0.69             | 0.12 | 5 | 0.45             | 0.38 | 5 |
|                          | Long-term toxicity study |      |   |                  |      |   |                  |      |   |                  |      |   |
| <b>150</b>               |                          |      |   |                  |      |   |                  |      |   | 0.64             | 0.41 | 4 |

**Supplementary Table 7** Summary of the CBC results for neutrophil counts (NEU) in  $10^3$  cells/ $\mu$ L (mean  $\pm$  SD). N indicates the sample size for each group.

| Timepoint<br>(days p.i.) | Control                  |      |   | IA<br>(1.85 MBq) |      |   | IA<br>(4.63 MBq) |      |   | IA<br>(9.25 MBq) |      |   |
|--------------------------|--------------------------|------|---|------------------|------|---|------------------|------|---|------------------|------|---|
|                          | Mean                     | SD   | N | Mean             | SD   | N | Mean             | SD   | N | Mean             | SD   | N |
| <b>0</b>                 | 1.29                     | 0.56 | 5 |                  |      |   |                  |      |   |                  |      |   |
|                          | Acute toxicity study     |      |   |                  |      |   |                  |      |   |                  |      |   |
| <b>0</b>                 |                          |      |   | 0.59             | 0.40 | 5 | 1.28             | 0.74 | 5 | 1.51             | 1.44 | 5 |
| <b>3</b>                 |                          |      |   | 1.73             | 1.07 | 5 | 3.52             | 2.19 | 5 | 3.22             | 1.15 | 5 |
| <b>7</b>                 |                          |      |   | 1.51             | 1.01 | 5 | 2.47             | 0.89 | 5 | 1.86             | 0.83 | 5 |
| <b>10</b>                |                          |      |   | 1.74             | 1.17 | 5 | 1.09             | 0.68 | 5 | 0.96             | 0.40 | 5 |
| <b>14</b>                |                          |      |   | 1.69             | 1.21 | 5 | 1.49             | 0.77 | 5 | 1.44             | 0.59 | 5 |
| <b>17</b>                |                          |      |   | 1.08             | 0.88 | 5 | 1.00             | 0.51 | 5 | 1.08             | 0.51 | 5 |
| <b>21</b>                |                          |      |   | 2.71             | 2.21 | 5 | 1.61             | 1.03 | 5 | 2.17             | 0.55 | 5 |
| <b>28</b>                |                          |      |   | 1.99             | 1.23 | 5 | 1.88             | 0.64 | 5 | 4.18             | 1.61 | 5 |
|                          | Long-term toxicity study |      |   |                  |      |   |                  |      |   |                  |      |   |
| <b>150</b>               |                          |      |   |                  |      |   |                  |      |   | 2.51             | 1.06 | 4 |

**Supplementary Table 8** Summary of the CBC results for red blood cell counts (RBC) in  $10^6$  cells/ $\mu$ L (mean  $\pm$  SD). N indicates the sample size for each group.

| Timepoint<br>(days p.i.) | Control                  |      |   | IA<br>(1.85 MBq) |      |   | IA<br>(4.63 MBq) |      |   | IA<br>(9.25 MBq) |      |   |
|--------------------------|--------------------------|------|---|------------------|------|---|------------------|------|---|------------------|------|---|
|                          | Mean                     | SD   | N | Mean             | SD   | N | Mean             | SD   | N | Mean             | SD   | N |
| <b>0</b>                 | 12.14                    | 0.41 | 5 |                  |      |   |                  |      |   |                  |      |   |
|                          | Acute toxicity study     |      |   |                  |      |   |                  |      |   |                  |      |   |
| <b>0</b>                 |                          |      |   | 12.80            | 2.42 | 5 | 11.56            | 0.43 | 5 | 11.58            | 0.60 | 5 |
| <b>3</b>                 |                          |      |   | 11.06            | 1.31 | 5 | 11.03            | 0.54 | 5 | 10.99            | 0.38 | 5 |
| <b>7</b>                 |                          |      |   | 11.07            | 0.64 | 5 | 10.70            | 0.23 | 5 | 8.73             | 0.60 | 5 |
| <b>10</b>                |                          |      |   | 10.61            | 0.80 | 5 | 10.92            | 0.54 | 5 | 9.11             | 0.64 | 5 |
| <b>14</b>                |                          |      |   | 10.86            | 0.44 | 5 | 10.42            | 0.21 | 5 | 8.89             | 0.35 | 5 |
| <b>17</b>                |                          |      |   | 10.01            | 0.95 | 5 | 11.31            | 0.30 | 5 | 9.41             | 1.98 | 5 |
| <b>21</b>                |                          |      |   | 11.00            | 0.49 | 5 | 11.13            | 0.79 | 5 | 10.53            | 0.55 | 5 |
| <b>28</b>                |                          |      |   | 10.97            | 1.15 | 5 | 11.05            | 0.45 | 5 | 9.79             | 0.58 | 5 |
|                          | Long-term toxicity study |      |   |                  |      |   |                  |      |   |                  |      |   |
| <b>150</b>               |                          |      |   |                  |      |   |                  |      |   | 9.62             | 1.01 | 4 |

**Supplementary Table 9** Summary of the CBC results for hemoglobin concentration (HGB) in g/dL (mean  $\pm$  SD). N indicates the sample size for each group.

| Timepoint<br>(days p.i.) | Control                  |      |      | IA<br>(1.85 MBq) |      |   | IA<br>(4.63 MBq) |      |   | IA<br>(9.25 MBq) |      |   |
|--------------------------|--------------------------|------|------|------------------|------|---|------------------|------|---|------------------|------|---|
|                          | Mean                     | SD   | N    | Mean             | SD   | N | Mean             | SD   | N | Mean             | SD   | N |
| <b>0</b>                 | 17.24                    | 1.00 | 5.00 |                  |      |   |                  |      |   |                  |      |   |
|                          | Acute toxicity study     |      |      |                  |      |   |                  |      |   |                  |      |   |
| <b>0</b>                 |                          |      |      | 16.20            | 0.97 | 5 | 16.48            | 0.73 | 5 | 16.44            | 0.81 | 5 |
| <b>3</b>                 |                          |      |      | 15.66            | 1.96 | 5 | 15.34            | 0.74 | 5 | 15.02            | 0.76 | 5 |
| <b>7</b>                 |                          |      |      | 15.24            | 0.29 | 5 | 14.68            | 0.47 | 5 | 11.28            | 0.75 | 5 |
| <b>10</b>                |                          |      |      | 15.56            | 1.58 | 5 | 15.28            | 1.00 | 5 | 12.22            | 0.88 | 5 |
| <b>14</b>                |                          |      |      | 15.34            | 0.58 | 5 | 14.26            | 0.35 | 5 | 12.36            | 0.69 | 5 |
| <b>17</b>                |                          |      |      | 14.00            | 1.40 | 5 | 15.58            | 0.47 | 5 | 13.90            | 1.35 | 5 |
| <b>21</b>                |                          |      |      | 15.64            | 0.92 | 5 | 15.90            | 1.29 | 5 | 15.00            | 0.57 | 5 |
| <b>28</b>                |                          |      |      | 14.74            | 1.60 | 5 | 15.44            | 0.82 | 5 | 14.04            | 0.84 | 5 |
|                          | Long-term toxicity study |      |      |                  |      |   |                  |      |   |                  |      |   |
| <b>150</b>               |                          |      |      |                  |      |   |                  |      |   | 12.75            | 1.31 | 4 |

**Supplementary Table 10** Summary of the CBC results for platelets count (RBC) in  $10^3$  cells/ $\mu$ L (mean  $\pm$  SD). N indicates the sample size for each group.

| Timepoint<br>(days p.i.) | Control                  |     |   | IA<br>(1.85 MBq) |     |   | IA<br>(4.63 MBq) |     |   | IA<br>(9.25 MBq) |        |   |
|--------------------------|--------------------------|-----|---|------------------|-----|---|------------------|-----|---|------------------|--------|---|
|                          | Mean                     | SD  | N | Mean             | SD  | N | Mean             | SD  | N | Mean             | SD     | N |
| <b>0</b>                 | 576                      | 120 | 5 |                  |     |   |                  |     |   |                  |        |   |
|                          | Acute toxicity study     |     |   |                  |     |   |                  |     |   |                  |        |   |
| <b>0</b>                 |                          |     |   | 151              | 99  | 4 | 609              | 92  | 5 | 742              | 111    | 5 |
| <b>3</b>                 |                          |     |   | 179              | 115 | 5 | 295              | 112 | 5 | 231              | 82     | 5 |
| <b>7</b>                 |                          |     |   | 197              | 122 | 5 | 118              | 40  | 5 | 87               | 23     | 5 |
| <b>10</b>                |                          |     |   | 128              | 79  | 5 | 149              | 75  | 5 | 98               | 41     | 5 |
| <b>14</b>                |                          |     |   | 176              | 137 | 5 | 144              | 110 | 5 | 150              | 71     | 5 |
| <b>17</b>                |                          |     |   | 124              | 120 | 5 | 214              | 130 | 5 | 504              | 684    | 5 |
| <b>21</b>                |                          |     |   | 112              | 25  | 5 | 197              | 37  | 5 | 192              | 102    | 5 |
| <b>28</b>                |                          |     |   | 343              | 113 | 5 | 233              | 63  | 5 | 213              | 51     | 5 |
|                          | Long-term toxicity study |     |   |                  |     |   |                  |     |   |                  |        |   |
| <b>150</b>               |                          |     |   |                  |     |   |                  |     |   | 460.75           | 128.63 | 4 |

**Supplementary Table 11** Summary of the blood chemistry panel in EL4 tumor-bearing mice injected with 90Y-NM600 (9.25 MBq) at days 5, 10, 28, and 150 post administration. N indicates the sample size for each group.

| Marker       | Control (Vehicle) |      |   | Day 5 (9.25 MBq) |      |   | Day 10 (9.25 MBq) |       |   | Day 28 (9.25 MBq) |      |   | Day 150 (9.25 MBq) |       |   |
|--------------|-------------------|------|---|------------------|------|---|-------------------|-------|---|-------------------|------|---|--------------------|-------|---|
|              | Mean              | SD   | N | Mean             | SD   | N | Mean              | SD    | N | Mean              | SD   | N | Mean               | SD    | N |
| ALB (g/dL)   | 4.2               | 0.2  | 3 | 4.3              | 0.2  | 3 | 4.8               | 0.2   | 3 | 5.0               | 0.2  | 3 | 3.5                | 1.0   | 4 |
| ALP (U/L)    | 112.3             | 18.0 | 3 | 95.0             | 6.1  | 3 | 88.7              | 59.2  | 3 | 121.3             | 29.0 | 3 | 62.5               | 28.7  | 4 |
| ALT (U/L)    | 33.0              | 4.0  | 3 | 39.3             | 19.1 | 3 | 123.7             | 114.4 | 3 | 42.0              | 11.8 | 3 | 47.8               | 5.0   | 4 |
| AMY (U/L)    | 795.3             | 30.2 | 3 | 779.3            | 21.0 | 3 | 774.7             | 49.7  | 3 | 749.3             | 64.0 | 3 | 865.8              | 137.8 | 4 |
| TBIL (mg/dL) | 0.3               | 0.1  | 3 | 0.4              | 0.1  | 3 | 0.3               | 0.1   | 3 | 0.3               | 0.0  | 3 | 0.2                | 0.0   | 4 |
| BUN (mg/dL)  | 22.7              | 2.5  | 3 | 25.0             | 2.6  | 3 | 19.7              | 8.1   | 3 | 20.0              | 1.7  | 3 | 21.8               | 5.5   | 4 |
| CA (mg/dL)   | 10.2              | 0.5  | 3 | 9.4              | 0.2  | 3 | 11.5              | 0.3   | 3 | 8.2               | 5.6  | 3 | 10.7               | 0.4   | 4 |
| PHOS (mg/dL) | 5.5               | 0.9  | 3 | 5.1              | 0.4  | 3 | 14.3              | 3.9   | 3 | 10.8              | 1.5  | 3 | 8.6                | 1.4   | 4 |
| CRE (mg/dL)  | 0.3               | 0.2  | 3 | 0.4              | 0.2  | 3 | 0.5               | 0.1   | 3 | 0.6               | 0.2  | 3 | 0.3                | 0.1   | 4 |
| GLU (mg/dL)  | 285.0             | 49.4 | 3 | 289.3            | 24.0 | 3 | 230.3             | 78.5  | 3 | 238.0             | 90.1 | 3 | 232.0              | 56.5  | 4 |
| NA+ (mmol/L) | 144.3             | 1.5  | 3 | 144.0            | 1.0  | 3 | 149.7             | 2.1   | 3 | 151.0             | 1.7  | 3 | 152.8              | 2.5   | 4 |
| K+ (mmol/L)  | 4.7               | 0.5  | 3 | 5.0              | 1.0  | 3 | 8.7               | 0.3   | 3 | 7.8               | 1.0  | 3 | 7.8                | 0.6   | 4 |
| TP (g/dL)    | 5.0               | 0.1  | 3 | 4.9              | 0.1  | 3 | 5.5               | 0.2   | 3 | 5.7               | 0.2  | 3 | 5.2                | 0.3   | 4 |
| GLOB (g/dL)  | 0.8               | 0.1  | 3 | 0.6              | 0.1  | 3 | 0.7               | 0.2   | 3 | 0.7               | 0.1  | 3 | 1.7                | 0.6   | 4 |



**Supplementary Table 12** Criteria for euthanasia in mice bearing systemic EL4 disease.

| Criteria    | Grade  |                                                |                                       |                                                          |                                                  |
|-------------|--------|------------------------------------------------|---------------------------------------|----------------------------------------------------------|--------------------------------------------------|
|             | 0      | 0.5                                            | 1                                     | 1.5                                                      | 2                                                |
| Activity    | Normal | Mild Decrease                                  | Moderately Decreased                  | Stationary unless stimulated                             | Stationary even when stimulated; labored breath. |
| Weight loss | <10%   | 10-15%                                         | 15-20%                                | 20-25%                                                   | 25-30%                                           |
| Hunch       | Normal | Hunched when stationary, goes away when active | Small permanent hunch                 | Moderate permanent hunch                                 | Severe hunch                                     |
| Appearance  | Normal | Slight Ruffle                                  | Moderate ruffle                       | Ruffle/Greasy                                            | Grizzled/Frizzy                                  |
| Paralysis   | Normal | Slow moving, less tension in tail upon lifting | Partial, mouse starts scratching legs | One leg completely paralyzed, other has partial mobility | Both legs are completely paralyzed (dragging)    |

-Euthanize if mouse reaches a total score of 4 or higher

-Euthanize if mouse reaches 2 on paralysis or activity or if they surpass 25% weight- loss
